# Supplementary material for: 7-Aminoalkoxy-Quinazolines from Epigenetic Focused Libraries Are Potent and Selective Inhibitors of DNA Methyltransferase 1
Source: MDPI journal article supplement (doi:10.3390/molecules27092892), 2022-04-30
Supplement: s1 [file s1]

## SUPPORTING INFORMATION

### 7-Aminoalkoxy-Quinazolines from Epigenetic Focused Libraries are Potent and Selective Inhibitors of DNA Methyltransferase 1

José L. Medina-Franco<sup>1,\*</sup>, Edgar López-López<sup>1,2</sup>, Liliam P. Martínez-Fernández<sup>1</sup>

<sup>1</sup> DIFACQUIM research group, Department of Pharmacy, School of Chemistry, National Autonomous University of Mexico, Avenida Universidad 3000, Mexico City 04510, Mexico.

<sup>2</sup> Department of Pharmacology, Center for Research and Advanced Studies of the National Polytechnic Institute (CINVESTAV), Avenida Instituto Politécnico Nacional 2508, Mexico City 07360, Mexico.

\*Corresponding author. Email: medinajl@unam.mx

#### Contents

|                  |                                                                                                                                 | Page |
|------------------|---------------------------------------------------------------------------------------------------------------------------------|------|
| <b>Table S1</b>  | Number of quinazolines and 7-aminoalkoxy-quinazolines present in various epigenetic focused libraries.                          | S2   |
| <b>Table S2</b>  | Results of the relative enzymatic activity of DNMT1 as percentages <sup>a</sup> .                                               | S3   |
| <b>Table S3</b>  | Results of dose-response evaluations for selected quinazolines (IC <sub>50</sub> ) with DNMT1, DNMT3A and DNMT3B <sup>a</sup> . | S3   |
| <b>Figure S1</b> | Analysis of 150 ns production of the molecular dynamics of production S-Adenil-Metione (SAM) against DNMT1.                     | S4   |
| <b>Figure S2</b> | Final conformational changes on DNMT1 from molecular dynamics calculations.                                                     | S5   |
| <b>Figure S3</b> | <i>In silico</i> profiling of the three compounds with the free online and validate server Epigenetic Target Profiler.          | S6   |

**Table S1.** Number of quinazolines and 7-aminoalkoxy-quinazolines present in various epigenetic focused libraries.

| DATABASE     | QUINAZOLINES | 7-AMINOALKOXY-<br>QUINAZOLINES |
|--------------|--------------|--------------------------------|
| ASINEX       | 4            |                                |
| AXON         | 8            | 7                              |
| CHEMDIV      | 559          |                                |
| ENAMINE      | 61           |                                |
| TARGETMOL    | 16           | 12                             |
| SELLECK      | 19           | 10                             |
| OTAVA_DNMT1  | 5            |                                |
| OTAVA_DNMT3B | 17           | 1                              |
| ENZO         | 1            | 1                              |
| LIFECHEM     | 18           |                                |
| TOTAL        | 708          | 31                             |

**Table S2.** Results of the relative enzymatic activity of DNMT1 as percentages <sup>a</sup>.

| COMPOUND            | DNMT1       |
|---------------------|-------------|
| MOLPORT-023-277-153 | 0.3 ± 0.10  |
| MOLPORT-035-789-726 | 0.7 ± 0.02  |
| MOLPORT-006-396-396 | 92.6 ± 2.40 |

<sup>a</sup> Mean value of two measurements ± standard deviation.

**Table S3.** Results of concentration-response assays for selected quinazolines (IC<sub>50</sub>) with DNMT1, DNMT3A and DNMT3B <sup>a</sup>.

| COMPOUND            | DNMT1 (IC <sub>50</sub> MM) | DNMT3A (IC <sub>50</sub> MM) | DNMT3B (IC <sub>50</sub> MM) |
|---------------------|-----------------------------|------------------------------|------------------------------|
| MOLPORT-023-277-153 | 0.030 (± 0.016)             | 4.87 (± 0.47)                | > 100 µM                     |
| MOLPORT-035-789-726 | 0.081 (± 0.029)             | 14.69 (± 0.56)               | > 100 µM                     |

<sup>a</sup> Mean value of two measurements ± standard deviation. SAH was included as a positive control: IC<sub>50</sub> (DNMT1) of 0.34 µM; IC<sub>50</sub> (DNMT3A) of 0.10 µM; (DNMT3B) of 0.03 µM.

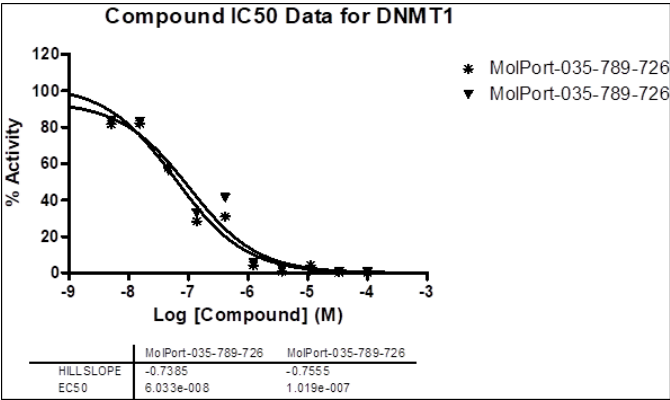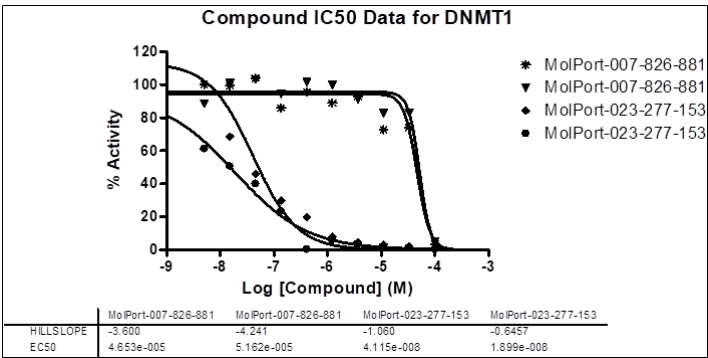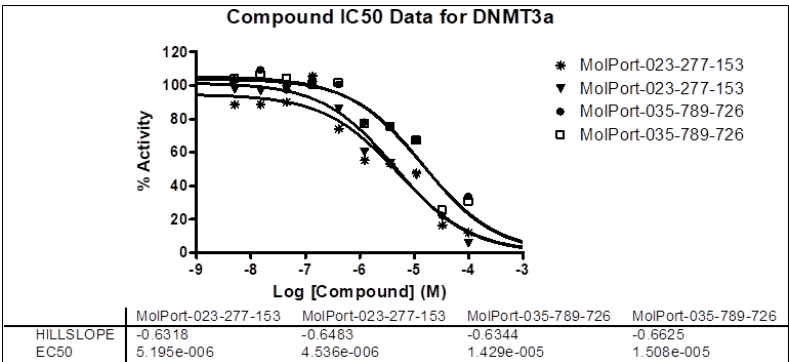

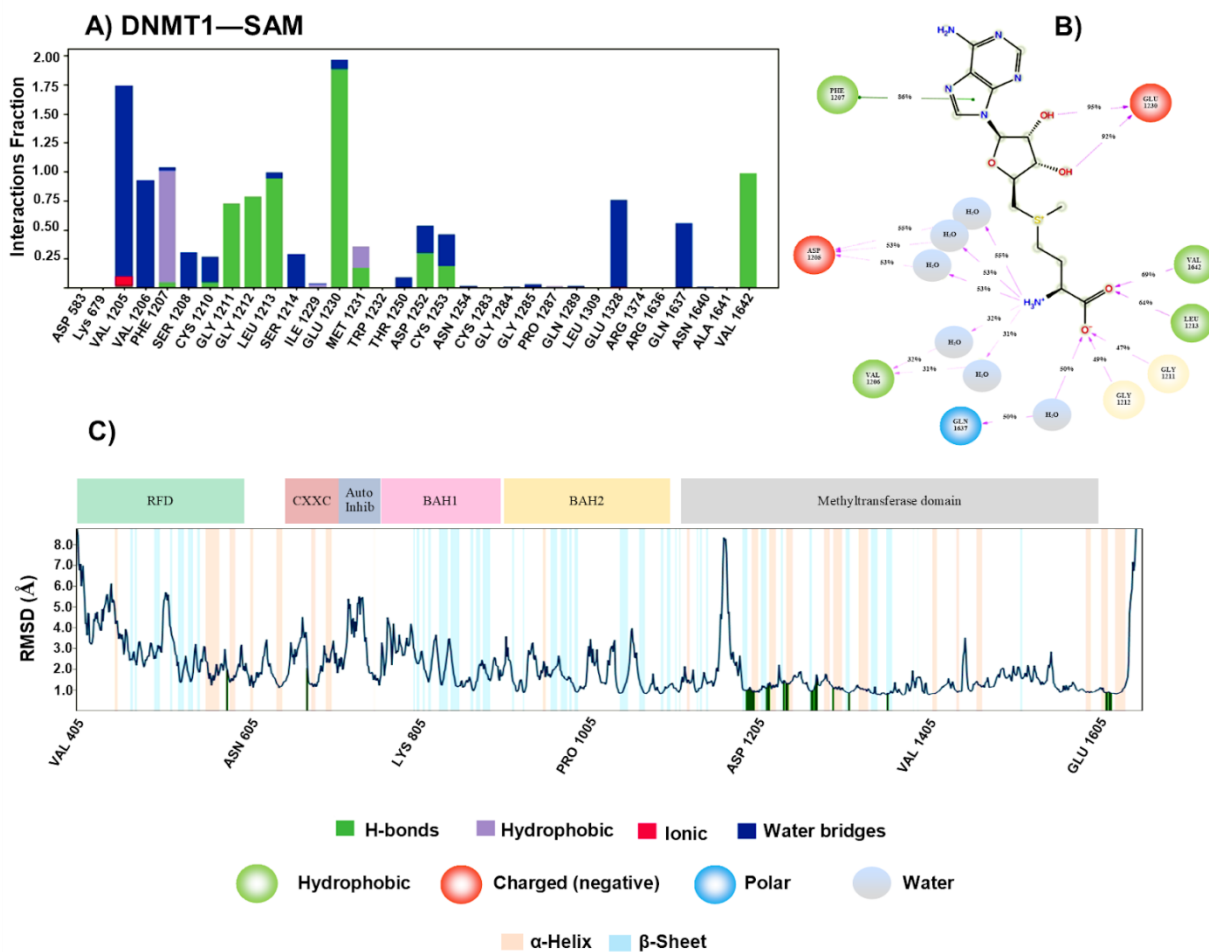

**Figure S1.** Analysis of 150 ns production of the molecular dynamics of production S-Adenil-Metione (SAM) against DNMT1. **A)** Molecular dynamic interactions of SAM against DNMT1. **B)** Molecular dynamic interactions of SAM against DNMT1 during the last 30ns of production. **C)** Conformational changes observed during the molecular dynamics of SAM against DNMT1.

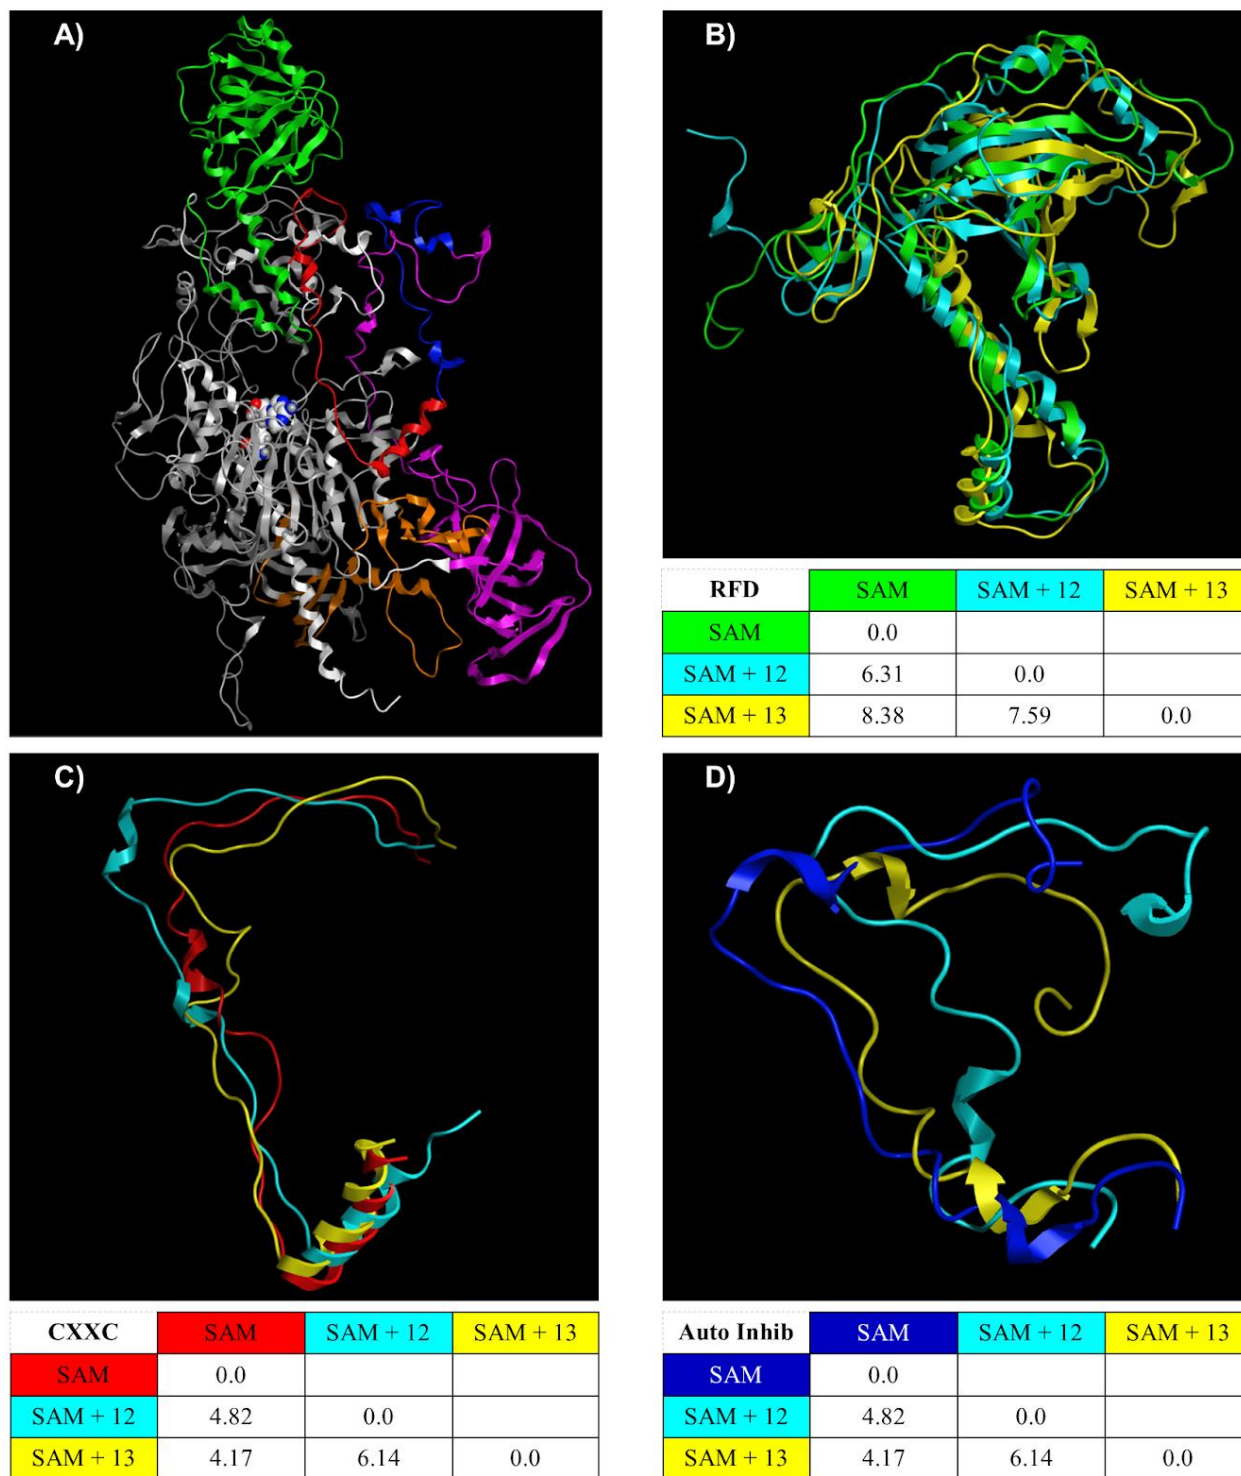

**Figure S2.** Final conformational changes on DNMT1 from molecular dynamics calculations. **A)** DNMT1-SAM model. The RFD (green), CXXC (red), autoinhibition (navy blue), BAH1 (pink), BAH2 (orange), and DNA-methyl transferase (gray) domains were shown. Panels **B)**, **C)**, and **D)** illustrate the conformational changes (with RMSD values) on the RFD, CXXC, and autoinhibition domains of DNMT1 in presence of SAM, SAM + 12, and SAM + 13, respectively.

# Epigenetic Target Profiler

MolPort-023-277-153

| Name                                                       | ChEMBL ID                     | Gene                   | Status    | Quartile |
|------------------------------------------------------------|-------------------------------|------------------------|-----------|----------|
| Histone-lysine N-methyltransferase, H3 lysine-9 specific 3 | <a href="#">CHEMBL6032</a>    | <a href="#">EHMT2</a>  | Known     |          |
| Serine-protein kinase ATM                                  | <a href="#">CHEMBL3797</a>    | <a href="#">ATM</a>    | Predicted | Q4       |
| Serine/threonine-protein kinase Aurora-A                   | <a href="#">CHEMBL4722</a>    | <a href="#">AURKA</a>  | Predicted | Q4       |
| Serine/threonine-protein kinase Aurora-B                   | <a href="#">CHEMBL2185</a>    | <a href="#">AURKB</a>  | Predicted | Q4       |
| Bromodomain-containing protein 2                           | <a href="#">CHEMBL1293289</a> | <a href="#">BRD2</a>   | Predicted | Q4       |
| Histone-arginine methyltransferase CARM1                   | <a href="#">CHEMBL5406</a>    | <a href="#">CARM1</a>  | Predicted | Q4       |
| Cyclin-dependent kinase 7                                  | <a href="#">CHEMBL3055</a>    | <a href="#">CDK7</a>   | Predicted | Q4       |
| CREB-binding protein                                       | <a href="#">CHEMBL5747</a>    | <a href="#">CREBBP</a> | Predicted | Q4       |
| Histone deacetylase 1                                      | <a href="#">CHEMBL325</a>     | <a href="#">HDAC1</a>  | Predicted | Q4       |
| Histone deacetylase 6                                      | <a href="#">CHEMBL1865</a>    | <a href="#">HDAC6</a>  | Predicted | Q4       |
| Histone deacetylase 8                                      | <a href="#">CHEMBL3192</a>    | <a href="#">HDAC8</a>  | Predicted | Q4       |
| Lysine-specific demethylase 4C                             | <a href="#">CHEMBL6175</a>    | <a href="#">KDM4C</a>  | Predicted | Q4       |
| Lysine-specific demethylase 5A                             | <a href="#">CHEMBL2424504</a> | <a href="#">KDM5A</a>  | Predicted | Q4       |
| Poly [ADP-ribose] polymerase-1                             | <a href="#">CHEMBL3105</a>    | <a href="#">PARP1</a>  | Predicted | Q4       |

MolPort-035-789-726

| Name                                                       | ChEMBL ID                     | Gene                   | Status    | Quartile |
|------------------------------------------------------------|-------------------------------|------------------------|-----------|----------|
| Histone-lysine N-methyltransferase, H3 lysine-9 specific 3 | <a href="#">CHEMBL6032</a>    | <a href="#">EHMT2</a>  | Known     |          |
| Serine-protein kinase ATM                                  | <a href="#">CHEMBL3797</a>    | <a href="#">ATM</a>    | Predicted | Q4       |
| Serine/threonine-protein kinase Aurora-A                   | <a href="#">CHEMBL4722</a>    | <a href="#">AURKA</a>  | Predicted | Q4       |
| Serine/threonine-protein kinase Aurora-B                   | <a href="#">CHEMBL2185</a>    | <a href="#">AURKB</a>  | Predicted | Q4       |
| Bromodomain-containing protein 2                           | <a href="#">CHEMBL1293289</a> | <a href="#">BRD2</a>   | Predicted | Q4       |
| Histone-arginine methyltransferase CARM1                   | <a href="#">CHEMBL5406</a>    | <a href="#">CARM1</a>  | Predicted | Q4       |
| Cyclin-dependent kinase 7                                  | <a href="#">CHEMBL3055</a>    | <a href="#">CDK7</a>   | Predicted | Q4       |
| CREB-binding protein                                       | <a href="#">CHEMBL5747</a>    | <a href="#">CREBBP</a> | Predicted | Q4       |
| Histone deacetylase 1                                      | <a href="#">CHEMBL325</a>     | <a href="#">HDAC1</a>  | Predicted | Q4       |
| Histone deacetylase 8                                      | <a href="#">CHEMBL3192</a>    | <a href="#">HDAC8</a>  | Predicted | Q4       |
| Lysine-specific demethylase 4C                             | <a href="#">CHEMBL6175</a>    | <a href="#">KDM4C</a>  | Predicted | Q4       |
| Lysine-specific demethylase 5A                             | <a href="#">CHEMBL2424504</a> | <a href="#">KDM5A</a>  | Predicted | Q4       |
| Poly [ADP-ribose] polymerase-1                             | <a href="#">CHEMBL3105</a>    | <a href="#">PARP1</a>  | Predicted | Q4       |
| Protein kinase N1                                          | <a href="#">CHEMBL3384</a>    | <a href="#">PKN1</a>   | Predicted | Q4       |
| DNA-dependent protein kinase                               | <a href="#">CHEMBL3142</a>    | <a href="#">PRKDC</a>  | Predicted | Q4       |

MolPort-006-396-396

| Name                                     | ChEMBL ID                     | Gene                   | Status    | Quartile |
|------------------------------------------|-------------------------------|------------------------|-----------|----------|
| Serine/threonine-protein kinase Aurora-A | <a href="#">CHEMBL4722</a>    | <a href="#">AURKA</a>  | Known     |          |
| Serine/threonine-protein kinase Aurora-B | <a href="#">CHEMBL2185</a>    | <a href="#">AURKB</a>  | Known     |          |
| Serine-protein kinase ATM                | <a href="#">CHEMBL3797</a>    | <a href="#">ATM</a>    | Predicted | Q1       |
| Histone-arginine methyltransferase CARM1 | <a href="#">CHEMBL5406</a>    | <a href="#">CARM1</a>  | Predicted | Q2       |
| Histone deacetylase 1                    | <a href="#">CHEMBL325</a>     | <a href="#">HDAC1</a>  | Predicted | Q2       |
| Histone deacetylase 3                    | <a href="#">CHEMBL1829</a>    | <a href="#">HDAC3</a>  | Predicted | Q2       |
| CREB-binding protein                     | <a href="#">CHEMBL5747</a>    | <a href="#">CREBBP</a> | Predicted | Q3       |
| Histone deacetylase 6                    | <a href="#">CHEMBL1865</a>    | <a href="#">HDAC6</a>  | Predicted | Q3       |
| Histone deacetylase 8                    | <a href="#">CHEMBL3192</a>    | <a href="#">HDAC8</a>  | Predicted | Q3       |
| Lysine-specific demethylase 4C           | <a href="#">CHEMBL6175</a>    | <a href="#">KDM4C</a>  | Predicted | Q3       |
| Lysine-specific demethylase 5A           | <a href="#">CHEMBL2424504</a> | <a href="#">KDM5A</a>  | Predicted | Q3       |
| Bromodomain-containing protein 2         | <a href="#">CHEMBL1293289</a> | <a href="#">BRD2</a>   | Predicted | Q4       |

**Figure S3.** *In silico* profiling of the three compounds with the free online and validate server Epigenetic Target Profiler. EHMT2 = G9a. The Quartile column indicates the confidence in the prediction (higher values indicate higher confidence. See details in the reference: Sánchez-Cruz. N. et al. J. Med. Chem. 2021, 64:8208-8220.
